# Supplementary material
Source: PubMed Central journal article supplement (PMC4179628)
Supplement: me-14-1154.pdf [file me-14-1154.pdf]

## Supplemental Legends.

### Fig. 1 Gonadotroph levels.

Blood was collected between 9 to 10am at different stages of the estrous cycle. A. LH levels were not significantly different between groups. B. Control FSH levels were significantly higher compared to PitARKO mice in all stages of cyclicity. N=6-15.

### Fig. 2 Quantitative real-time PCR.

A. *Nr5A1* (SF-1) expression in KO mice was significantly decreased when compared to control after OVX, however, there was no difference between control and KO at basal and after estradiol replacement B. and C. *BMP2* and *Nr5A2* were also measured and there was similar expression between control and KO at basal, after OVX and estradiol replacement. N=6-11.

### Fig. 3 *Gnrh* mRNA expression in AVPV of hypothalamus.

Rostral hypothalamus, including the AVPV, was isolated and *Gnrh* mRNA was measured from control and PitARKO mice. There was no significant difference between control and PitARKO mice, intact, OVX and OVX+E2 stage. N=6-12

### Fig. 4 AR knockout allele in pituitary genomic DNA.

Tissues were collected from AR<sup>fl/fl</sup>;  $\alpha$ Cre<sup>+</sup> mouse. Genomic DNA isolation and PCR were performed as described in materials and methods. AR floxed allele was observed in tail, OV (ovary), pit (pituitary), hyp (hypothalamus) and liv (liver). However, AR knockout allele was only observed in pituitary, and not in tail, ovary, hypothalamus and liver.

### Fig. 5 mRNA expression, ovary follicles and fertility.

A. Thyroid stimulating hormone beta subunit (*TSH $\beta$* ) was measured from pituitary. B-D Steroidogenic enzyme mRNA expressions: *StAR*, *Cyp17* and *Cyp19* mRNA were measured from ovary. There was no significant difference among AR<sup>fl/fl</sup>;acre<sup>-</sup>; AR<sup>fl/wt</sup>;acre<sup>-</sup> and PitARKO mice. E. Corpora Lutea (CL), antral follicles and preantral follicles (primordial, primary, secondary follicles) were examined and only KO mice showed a significant reduction in CL. N=6-9. F-H. Female mice were introduced with a proven

fertile male WT mouse and the total numbers of litters per female were recorded during the 90 days. There was no significant difference among ARfl/wt;acre-, ARfl/fl; acre- and KO groups (F). Number of pups per mouse per litter was significantly reduced in KO mice compared to ARfl/wt;acre-, ARfl/fl; acre- mice during the 90 days (G). There was no significant difference between ARwt/wt;acre- and ARwt/wt;acre+ groups (H). N=6.

**Fig. 6** Western blot of AR.

Western blot was performed as in Fig. 1 B1 with protein molecular marker loaded in the first well. We observed reduced protein levels of AR in the pituitary but not in other tissues collected.

**Fig. 7** Immunostaining of AR and LH showing co-localization in the mouse pituitary of control mouse.

LH (Green fluorescence) expressed in the cytoplasm; AR (Red fluorescence) expressed mainly in nucleus. A. Sections under 10x objective fluorescence microscope. B. Sections under 40x objective fluorescence microscope. Arrows point to the nucleus in which AR and LH colocalize in the merged panel of control pituitary.

Sections of pituitaries (6 pituitaries/group) were evaluated under the 40x objective fluorescence microscope by counting all of the immunodetectable LH expressing cells and those LH expressing cells that also express nucleated AR from random selected area of each anterior pituitary. 99% of gonadotropes (gonadotropic cells) express nucleated AR co-localization within LH cytoplasm in control mice and 98% of gonadotropes do not express nucleated AR in PitARKO mice.

# Supplemental data

Table 1. Primers

| F-forward; R-reverse |       | Primers                         | References     |
|----------------------|-------|---------------------------------|----------------|
| <b>lhβ</b>           | F     | GGCCGCAGAGAATGAGTTCTG           |                |
|                      | R     | CTGAGGCACAGGAGGCAAA             |                |
|                      | Probe | CATGGTCCGAGTACTGCCGGCTG         |                |
| <b>fshβ</b>          | F     | GCCGTTTCTGCATAAGC               |                |
|                      | R     | CAATCTTACGGTCTCGTATACC          |                |
|                      | Probe | CAATACCACTTGGTGTGCGGGCTA        |                |
| <b>gnrh</b>          | F     | CCAACGGAAGCTCGAGATCC            |                |
|                      | R     | TGCCGGCCATCAGTTTGAG             |                |
|                      | Probe | TGACTTTCACATCCAACAGAGTGGACA     |                |
| <b>AR</b>            | F     | GGCGGTCCTTCACTAATGTCAACT        |                |
|                      | R     | GAGACTTGTGCATGCGGTACTCAT        |                |
|                      | Probe | CCAGGATGCTCTACTTTGCACCTGA       |                |
| <b>activinA</b>      | F     | ATCATCACCTTTGCCGAGTC            | 1              |
|                      | R     | CCCTTTAAGCCCATTTCTC             | 1              |
| <b>activinb</b>      | F     | ATCATCACCTTTGCCGAGTC            | 1              |
|                      | R     | CCCTTTAAGCCCATTTCTC             | 1              |
| <b>prolactin</b>     | F     | CAAGGAACAAGCCCTGAAAAG           | 1              |
|                      | R     | ATCCCATTTCCTTTGGCTTC            | 1              |
| <b>pacap1</b>        | F     | CCTATCGAAAAGTCTTGGAC            | adapted from 2 |
|                      | R     | TTGACAGCCATTTGTTTTCG            | adapted from 2 |
| <b>Nr5a1</b>         | F     | ATC GAC AAG ACG CAG CGT AA      | 3              |
|                      | R     | CCC ACC GTC AGG CAC TTC         | 3              |
| <b>Nr5a2</b>         | F     | CCA GAC CCT GTT CTC CAT TGT T   | 3              |
|                      | R     | CAT TTG GTC ATC AAC CTT CAG TTC | 3              |
| <b>BMP2</b>          | F     | GCTCCACAAACGAGAAAAGC            | 1              |
|                      | R     | AGCAAGGGGAAAAGGACACT            | 1              |
| <b>StAR</b>          | F     | CCCAAAGAAGGCATAGCAAG            |                |
|                      | R     | GCTGAATCCCCAAACTTCT             |                |
| <b>CYP17</b>         | F     | GATCTAAGAAGCGCTCAGGCA           |                |
|                      | R     | GGGCACTGCATCACGATAAA            |                |
| <b>CYP19</b>         | F     | TTGGAAATGCTGAACCCCAT            |                |
|                      | R     | CAAGAATCTGCCATGGGAAA            |                |
| <b>gnrhR</b>         | F     | AAGACCCACGAACTACAGC             |                |
|                      | R     | GTCCAGCAGACGACAAAGGAG           |                |
|                      | Probe | TCCAAGAATAATATCCCAAGAGCTCGGC    |                |
| <b>gapdh</b>         | F     | GGGCATCTTGGGCTACACT             |                |
|                      | R     | GGCATCGAAGGTGGAAGAGT            |                |
|                      | Probe | AGGACCAGGTTGTCTCCTGCGA          |                |
| <b>TSHβ</b>          | F     | TCAACACCACCATCTGTGCT            | 1              |
|                      | R     | TCTGACAGCCTCGTGATGC             | 1              |

Suppl.  
Fig. 1

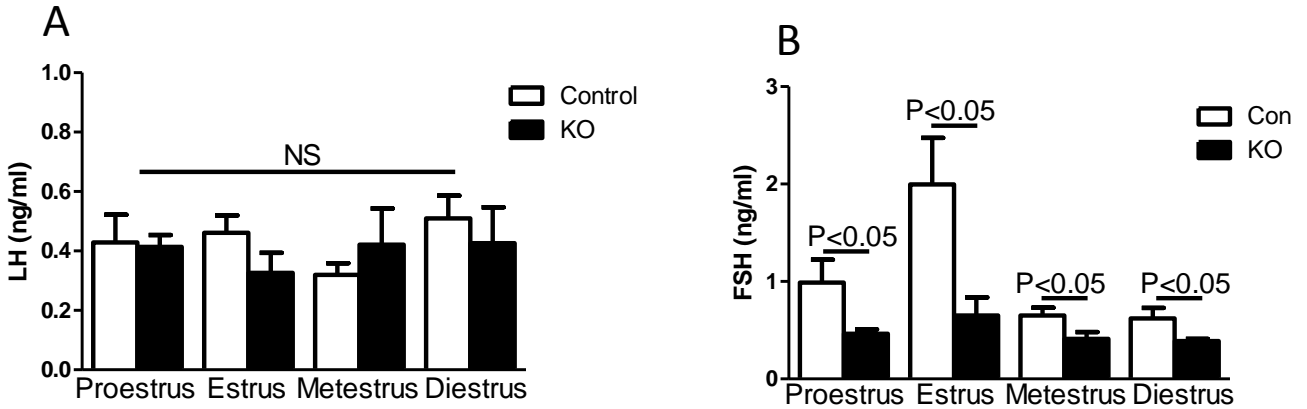

Suppl.  
Fig. 2

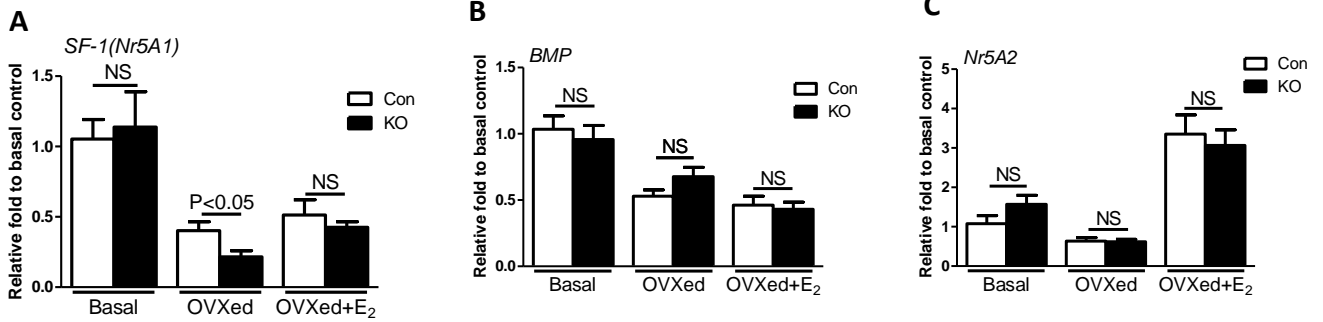

Suppl.  
Fig. 3

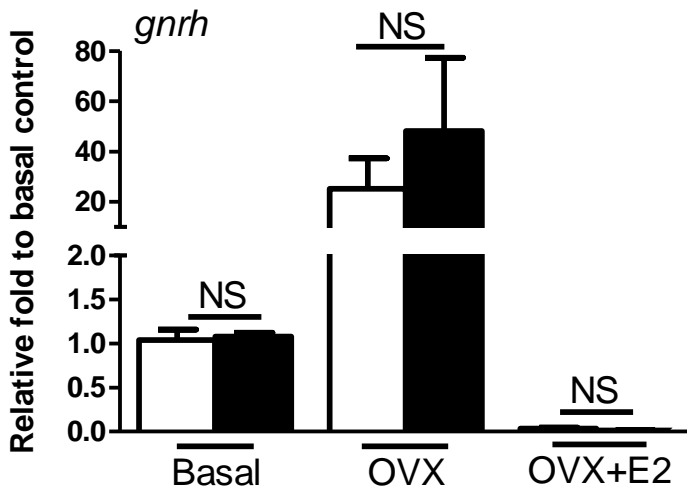

## Suppl. Fig. 4

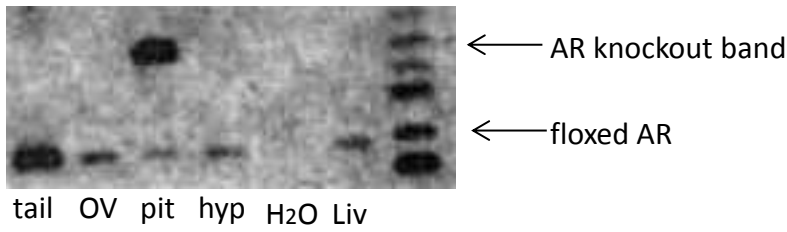

## Suppl. Fig. 5

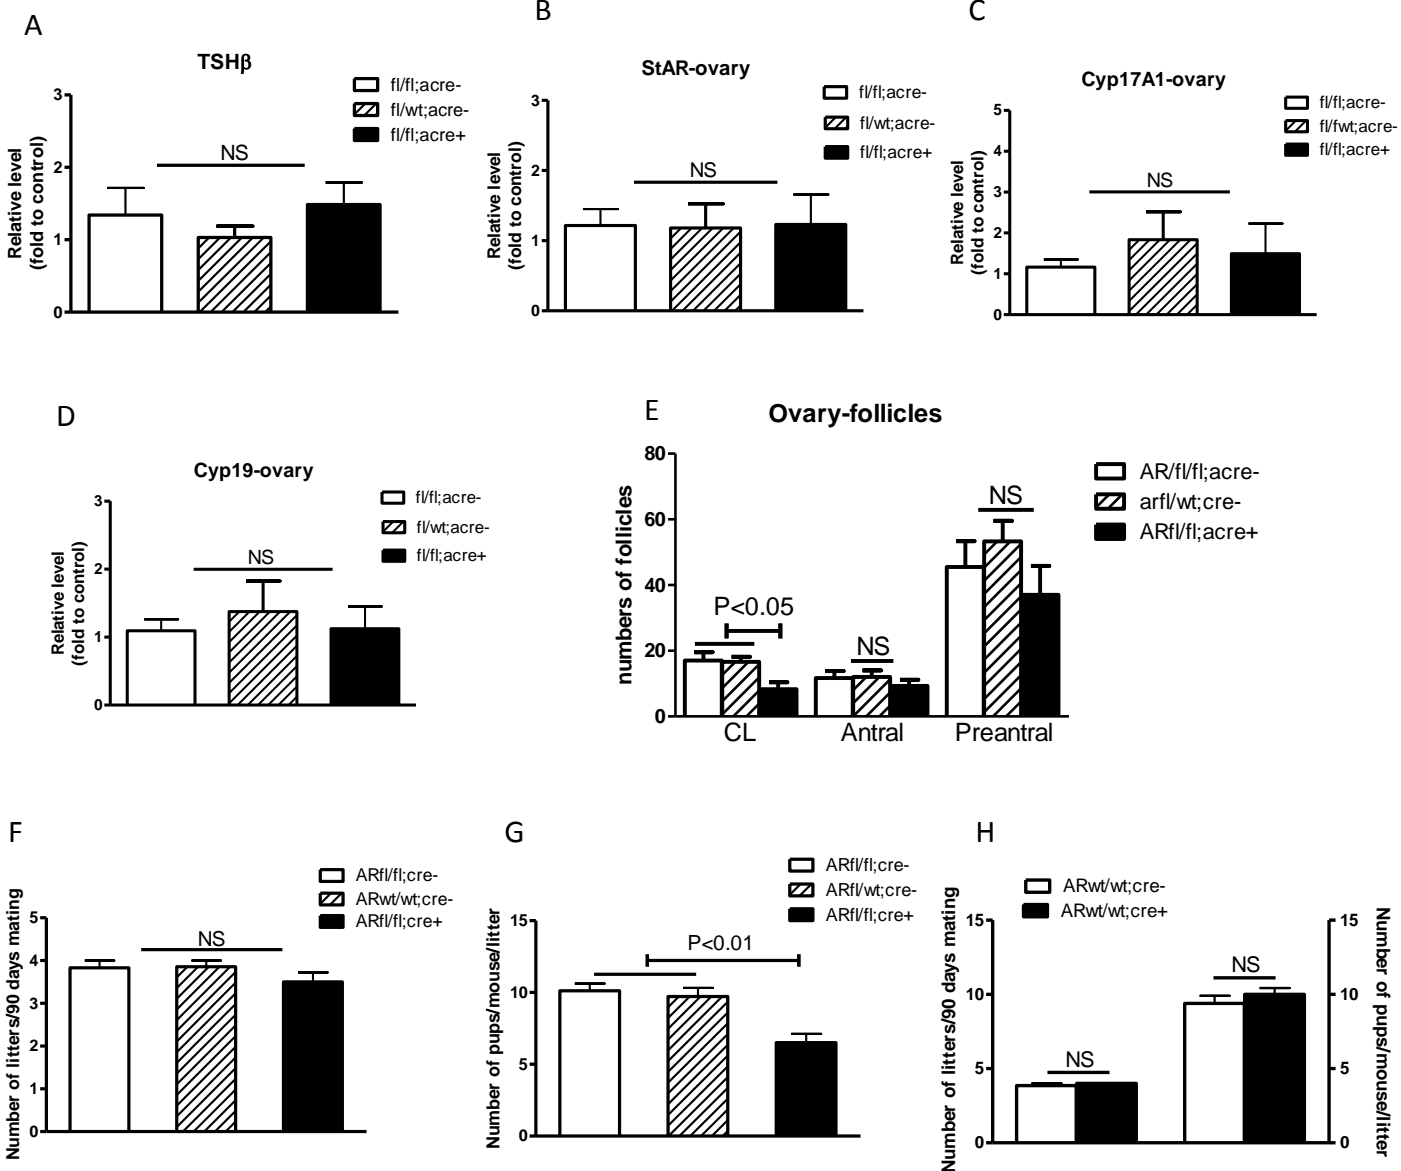

Suppl. Fig. 6

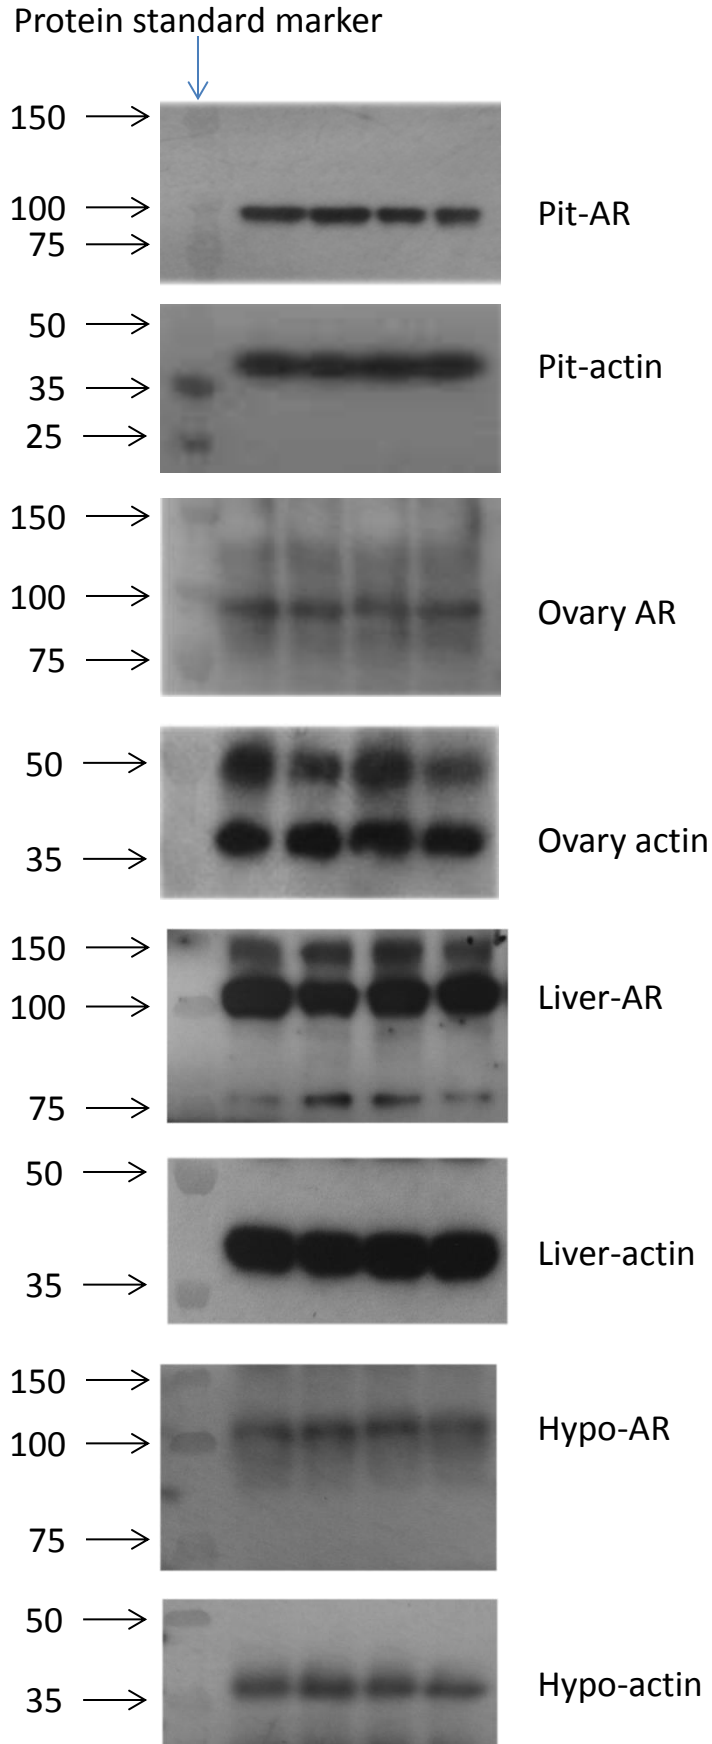

Suppl. Fig. 7

A

Control

PitARKO

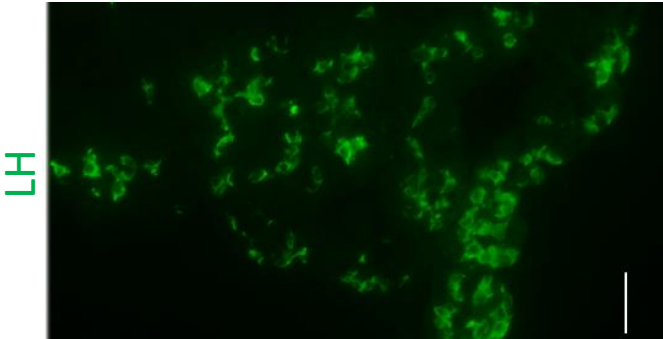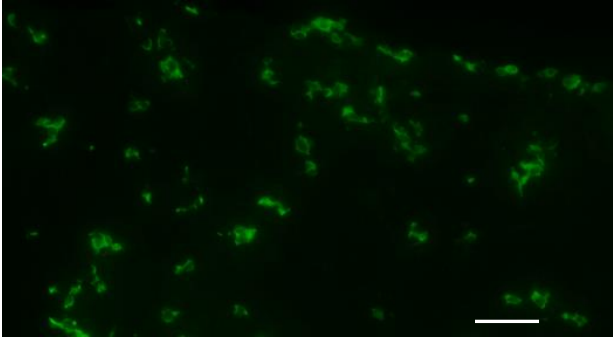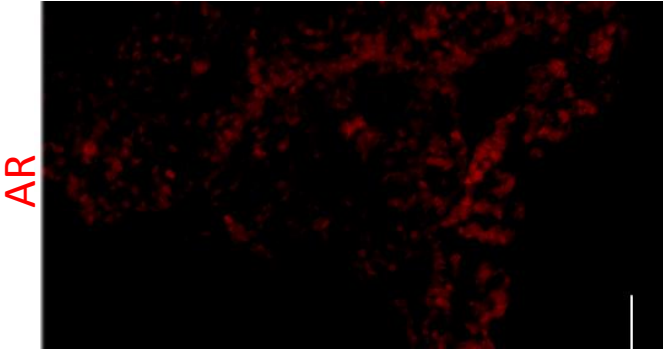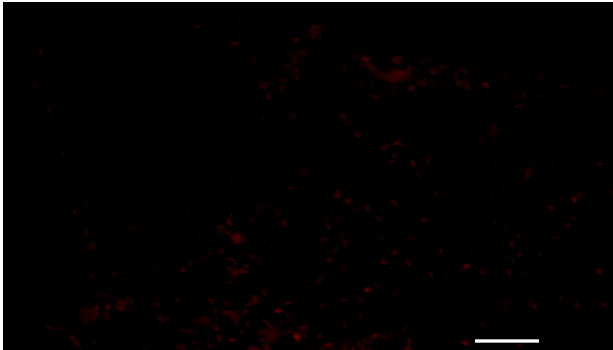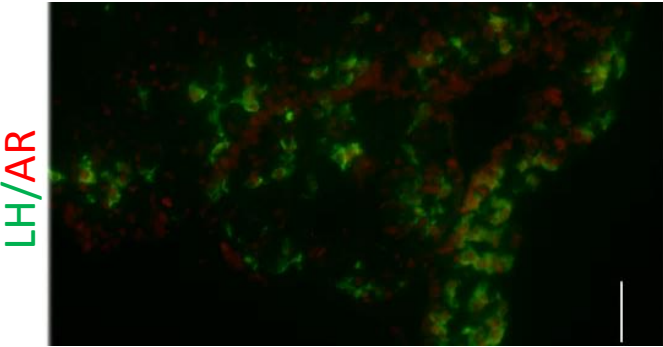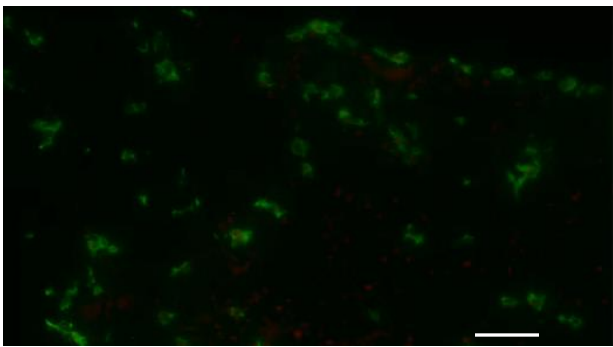

B

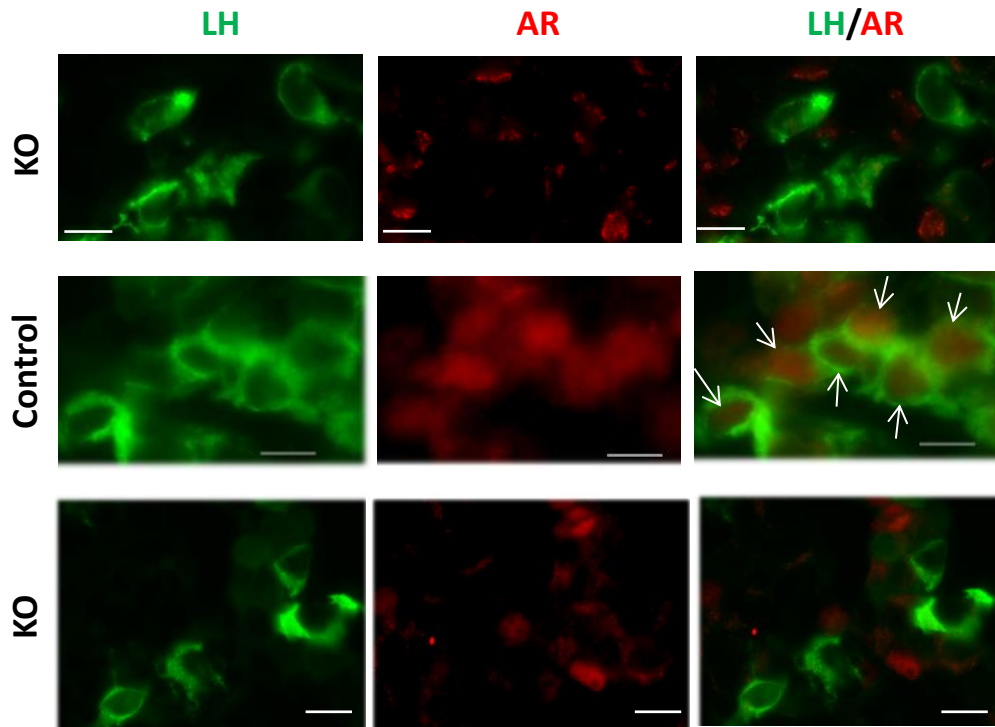



## References

1. Liu Z, Castrillon DH, Zhou W, Richards JS 2013 FOXO1/3 depletion in granulosa cells alters follicle growth, death and regulation of pituitary FSH. *Mol Endocrinol* 27:238-252
2. Moore JP, Jr, Winters SJ 2008 Weaning and the developmental changes in follicle-stimulating hormone, pituitary adenylate cyclase-activating polypeptide, and inhibin B in the male rat. *Biol Reprod* 78:752-760
3. Zheng W, Jimenez-Linan M, Rubin BS, Halvorson LM 2007 Anterior pituitary gene expression with reproductive aging in the female rat. *Biol Reprod* 76:1091-1102
